# Supplementary material for: Systematic Surveillance Detects Multiple Silent Introductions and Household Transmission of Methicillin-Resistant Staphylococcus aureus USA300 in the East of England
Source: PubMed Central journal article supplement (PMC4936647; doi:10.1093/infdis/jiw166), 2016-04-27

### Supplementary files:

Table S1: Accession numbers and temporal data for USA300 isolates. \*Day 1: The first day of this study.

Figure S1: Map of East of England showing the residences of individuals from which USA300 was isolated, using postcode area. Yellow: one case; orange: two cases; red: three cases. H: hospital location.

Figure S2: Hospital admission and sampling data for individuals with closely related isolates for up to two years prior to study. Each block represents time periods in contact with healthcare. Blue: Admission to specific hospital ward. Green: Visit to specific general practice. Grey: Wards or general practices visited by one individual only. Closed black circles: time of positive MRSA sample collection.

S1: Accession numbers and temporal data for isolates.

\*Day 1: The first day of this study.

| <b>Study ID</b> | <b>Accession Number</b> | <b>Day Collected*</b> |
|-----------------|-------------------------|-----------------------|
| 1               | ERR355935               | 33                    |
| 2               | ERR737219               | 290                   |
| 2               | ERR715303               | 295                   |
| 3               | ERR736964               | 155                   |
| 3               | ERR714975               | 155                   |
| 4               | ERR701945               | 132                   |
| 4               | ERR730959               | 133                   |
| 5               | ERR737332               | 327                   |
| 6               | ERR213001               | 83                    |
| 7               | ERR715353               | 253                   |
| 7               | ERR737176               | 253                   |
| 7               | ERR715295               | 281                   |
| 8               | ERR714843               | 231                   |
| 8               | ERR702215               | 280                   |
| 9               | ERR212793               | 10                    |
| 9               | ERR702170               | 238                   |
| 9               | ERR702210               | 238                   |
| 9               | ERR702208               | 280                   |
| 10              | ERR736945               | 115                   |

|    |           |     |
|----|-----------|-----|
| 10 | ERR730953 | 130 |
| 10 | ERR774759 | 167 |
| 11 | ERR737468 | 335 |
| 12 | ERR737164 | 239 |
| 13 | ERR736985 | 134 |
| 13 | ERR702055 | 134 |
| 13 | ERR715270 | 138 |
| 14 | ERR737324 | 321 |
| 14 | ERR715384 | 334 |
| 15 | ERR737105 | 274 |
| 16 | ERR737359 | 135 |
| 17 | ERR715072 | 196 |
| 18 | ERR715053 | 183 |
| 18 | ERR737021 | 184 |
| 18 | ERR736975 | 186 |
| 18 | ERR736978 | 187 |
| 18 | ERR715314 | 189 |
| 19 | ERR737537 | 298 |
| 20 | ERR715099 | 352 |
| 21 | ERR714960 | 152 |
| 22 | ERR212784 | 8   |
| 22 | ERR742877 | 11  |
| 22 | ERR737644 | 12  |

|    |           |     |
|----|-----------|-----|
| 22 | ERR715403 | 12  |
| 22 | ERR715191 | 27  |
| 22 | ERR715264 | 27  |
| 22 | ERR715260 | 88  |
| 22 | ERR715227 | 95  |
| 22 | ERR715193 | 95  |
| 22 | ERR715192 | 95  |
| 22 | ERR715262 | 111 |
| 22 | ERR742912 | 155 |
| 22 | ERR715341 | 232 |
| 22 | ERR702200 | 232 |
| 22 | ERR737503 | 344 |
| 23 | ERR702050 | 134 |
| 24 | ERR701919 | 124 |

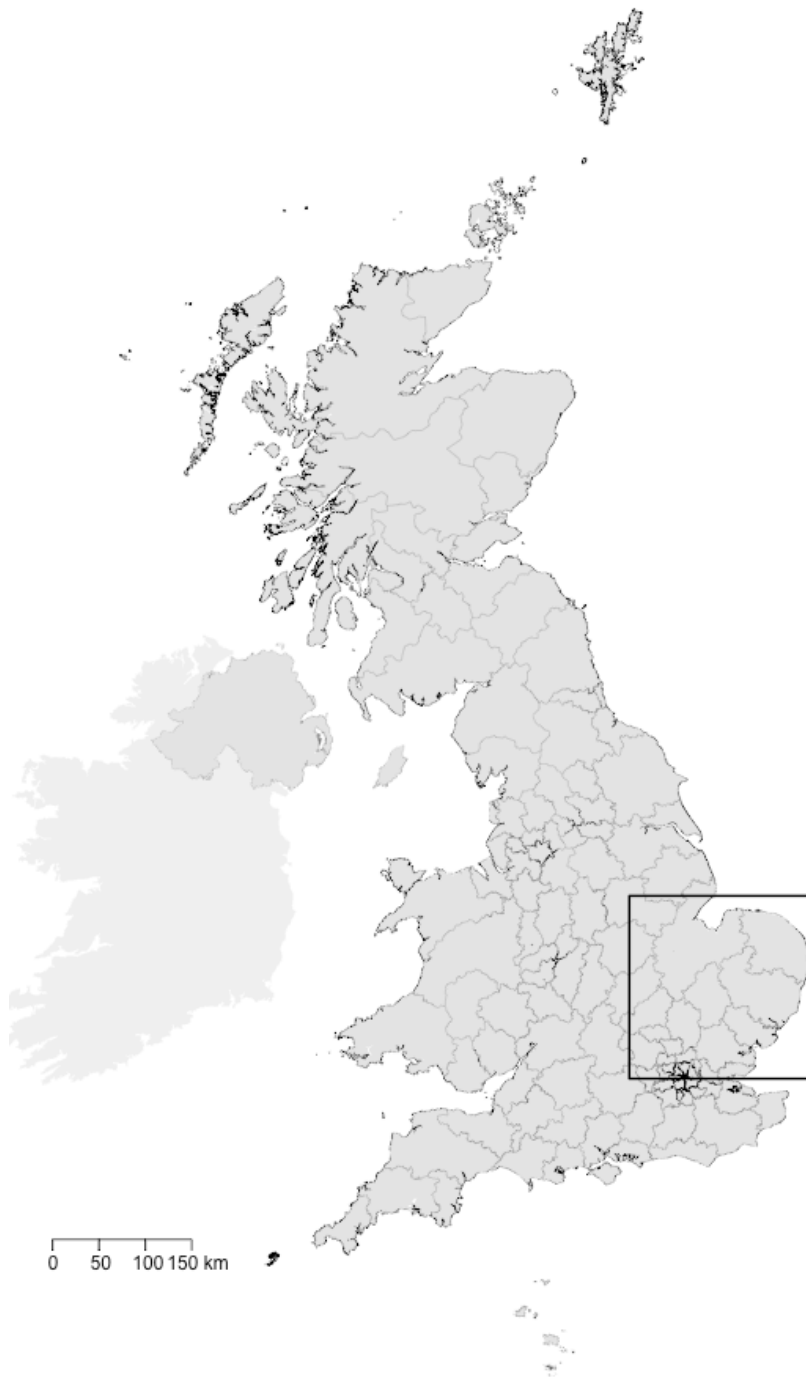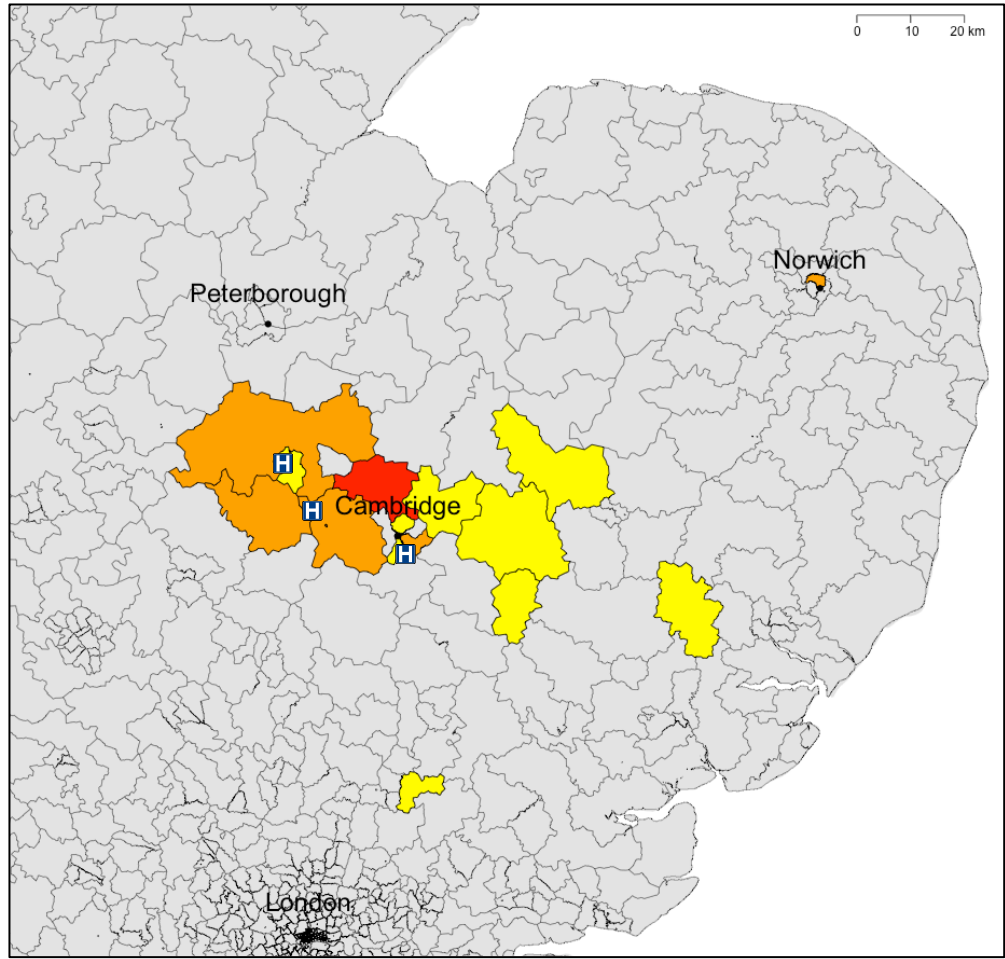

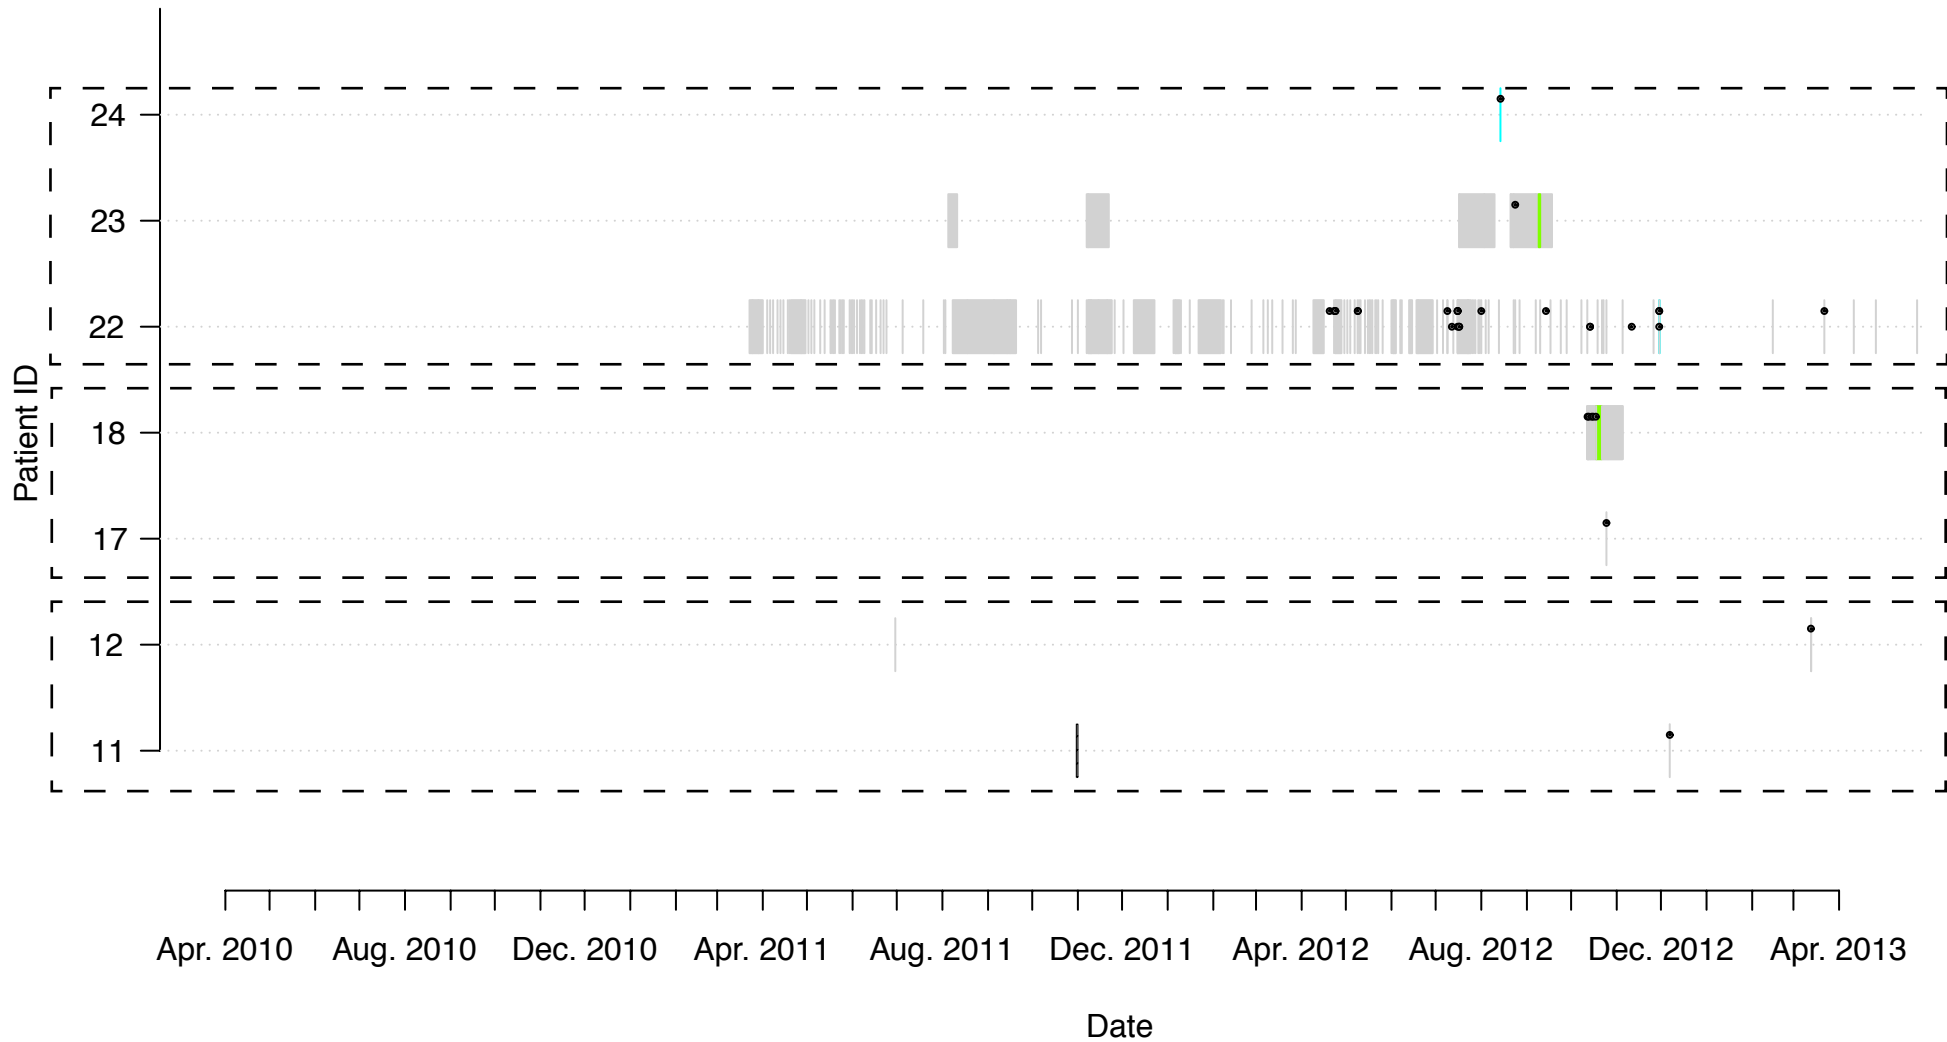

Supplement: supp_jiw166_jiw166supp.pdf [file supp_jiw166_jiw166supp.pdf]
